# Supplementary material
Source: PubMed Central journal article supplement (PMC7848989)
Supplement: AAC.02408-20-s0001.pdf [file AAC.02408-20-s0001.pdf]

1 **Table S1.** Probability of target attainment for achieving (a) a 24-hour AUC/MIC  $\geq 400$  and (b)  
 2 a 24-hour AUC/MIC  $\geq 400$  and an AUC/MIC  $\leq 600$ .<sup>a</sup>

| MIC<br>(mg/L) | eGFR<br>(mL/min/1.73 m <sup>2</sup> ) | (a) AUC/MIC $\geq 400$ |    |     |     |     |     | (b) AUC/MIC = 400 to 600 |    |    |    |    |    |
|---------------|---------------------------------------|------------------------|----|-----|-----|-----|-----|--------------------------|----|----|----|----|----|
|               |                                       | Total Daily Dose       |    |     |     |     |     | Total Daily Dose         |    |    |    |    |    |
|               |                                       | (g)                    |    |     |     |     |     | (g)                      |    |    |    |    |    |
|               |                                       | 1                      | 2  | 3   | 4   | 5   | 6   | 1                        | 2  | 3  | 4  | 5  | 6  |
| 1             | 0-30                                  | 29                     | 94 | 100 | 100 | 100 | 100 | 24                       | 31 | 6  | 0  | 0  | 0  |
|               | 30-60                                 | 14                     | 81 | 98  | 100 | 100 | 100 | 13                       | 42 | 17 | 4  | 1  | 0  |
|               | 60-90                                 | 4                      | 62 | 94  | 99  | 100 | 100 | 4                        | 43 | 32 | 12 | 3  | 1  |
|               | 90-120                                | 1                      | 40 | 81  | 96  | 99  | 100 | 1                        | 33 | 41 | 23 | 11 | 4  |
| 2             | 0-30                                  | 3                      | 31 | 72  | 86  | 98  | 100 | 3                        | 25 | 42 | 25 | 20 | 14 |
|               | 30-60                                 | 0                      | 16 | 52  | 81  | 92  | 99  | 0                        | 15 | 36 | 41 | 29 | 17 |
|               | 60-90                                 | 0                      | 3  | 34  | 65  | 85  | 95  | 0                        | 2  | 31 | 45 | 35 | 30 |
|               | 90-120                                | 0                      | 2  | 9   | 35  | 68  | 83  | 0                        | 1  | 7  | 29 | 50 | 48 |

3 <sup>a</sup>Abbreviations: MIC, minimum inhibitory concentration; eGFR, estimated glomerular  
 4 filtration rate obtained by the CKD-EPI formula; AUC, area under the concentration-time curve  
 5 at steady-state over 24 h; MIC of less than 1mg/L was presumed to be MIC of 1mg/L
